# Supplementary material for: A Janus MoSSe monolayer: a potential wide solar-spectrum water-splitting photocatalyst with a low carrier recombination rate
Source: Royal Society of Chemistry journal article supplement (doi:10.1039/c7ta10015a), 2018-01-01
Supplement: c7ta10015a1.pdf [file c7ta10015a1.pdf]

## Supporting Information

### **Janus MoSSe monolayer: A potential wide solar-spectrum water-splitting photocatalyst with low carrier recombination rate**

Xiangchao Ma<sup>1</sup>, Xin Wu<sup>1</sup>, Haoda Wang<sup>2</sup> and Yucheng Wang<sup>1</sup>

1. School of Physics and Optoelectronic Engineering, Xidian University,  
Xi'an, 710071, China
2. School of Telecommunications Engineering, Xidian University, Xi'an,  
710071, China

\*Correspondence to: [xcma@xidian.edu.cn](mailto:xcma@xidian.edu.cn); [xwu@xidian.edu.cn](mailto:xwu@xidian.edu.cn)

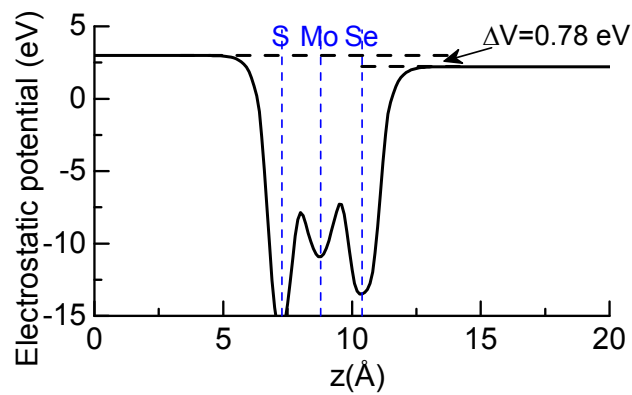

Figure S1. Local electrostatic potential versus atomic layers for pristine MoS<sub>2</sub> monolayer.

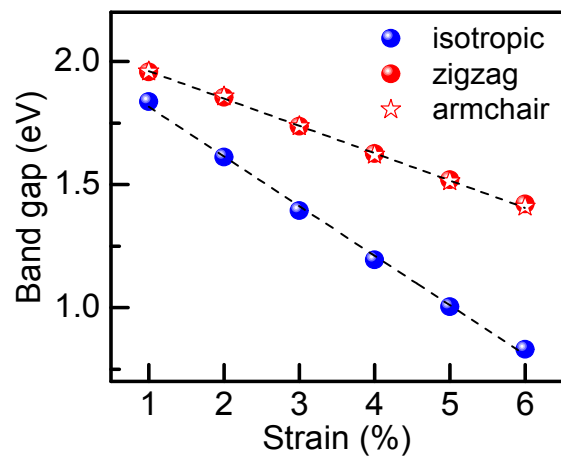

Figure S2. Band gap of MoS<sub>2</sub> monolayer as a function of the applied strains. The black dashed lines are linear fitting to the data.

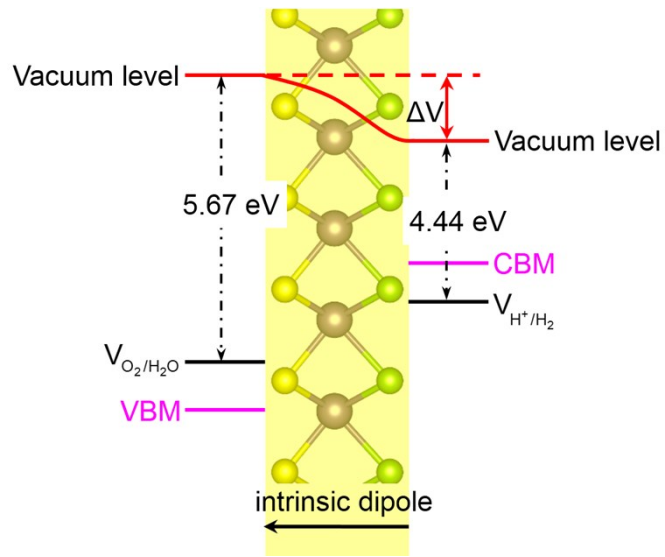

Scheme S1. Schematic plot of energy levels for MoSSe monolayer.  $\Delta V$  denotes the potential difference between the two sides of MoSSe that is induced by its intrinsic dipole.

Table S1. Calculated elastic modulus  $C_\alpha$ , effective masses of carriers in the unit of free-electron mass, and the deformation potential  $E_\alpha^y$  for the pristine MoSSe.

|           | $m_x^*$ | $m_y^*$ | $C_x$ [J/m <sup>2</sup> ] | $C_y$ [J/m <sup>2</sup> ] | $E_d^x$ [eV] | $E_d^y$ [eV] |
|-----------|---------|---------|---------------------------|---------------------------|--------------|--------------|
| electrons | 0.57    | 0.57    | 102.54                    | 99.99                     | 8.22         | 8.43         |
| holes     | 4.65    | 4.64    | 102.54                    | 99.99                     | 3.06         | 3.09         |
